# Supplementary material for: Synthesis, crystal structures, and electronic properties of one dimensional Ba9Sn3(Te1−xSex)15 (x = 0–1)
Source: Royal Society of Chemistry journal article supplement (doi:10.1039/c7qi00219j), 2017-01-01
Supplement: c7qi00219j1.pdf [file c7qi00219j1.pdf]

## Electronic Supplementary Information (ESI) available for:

# Synthesis, Crystal Structures, and Electronic Properties of One Dimensional $\text{Ba}_9\text{Sn}_3(\text{Te}_{1-x}\text{Se}_x)_{15}$ ( $x=0-1$ )

Jun Zhang<sup>a</sup>, Rui Su<sup>b</sup>, Xiancheng Wang<sup>\*a</sup>, Wenmin Li<sup>a</sup>, Jianfa Zhao<sup>a</sup>, Zheng Deng<sup>a</sup>, Sijia Zhang<sup>a</sup>, Shaomin Feng<sup>a</sup>, Qingqing Liu<sup>a</sup>,  
Huaizhou Zhao<sup>a</sup>, Pengfei Guan<sup>\*b</sup> and Changqing Jin<sup>\*a,c,d</sup>

<sup>a</sup> Beijing National Laboratory for Condensed Matter Physics, Institute of Physics, Chinese Academy of Sciences, Beijing 100190 &  
University of Chinese Academy of Sciences, Beijing 100049, China.

<sup>b</sup> Beijing Computational Science Research Center, Beijing 100193, China

<sup>c</sup> Collaborative Innovation Center of Quantum Matter, Beijing 100190, China

<sup>d</sup> School of Physical Sciences, University of Chinese Academy of Sciences, Beijing 100190, China

Table SI-SIV presents the results of refinement of single crystal X-ray diffraction for  $\text{Ba}_9\text{Sn}_3\text{Te}_{15}$ . Table SV-SIX shows the crystallographic data for  $\text{Ba}_9\text{Sn}_3(\text{Te}_{1-x}\text{Se}_x)_{15}$  ( $x = 0.2, 0.4, 0.6, 0.8$  and  $1$ ) refined from powder X-ray diffractions, respectively. Fig. S1-S5 presents the powder X-ray diffraction and their refinement for  $\text{Ba}_9\text{Sn}_3(\text{Te}_{1-x}\text{Se}_x)_{15}$  ( $x = 0.2, 0.4, 0.6, 0.8$  and  $1$ ), respectively. From the Table SV-SIX, we can see that the doped Se atoms favor to firstly occupy the Te1 and Te2 sites. When increasing the doping level of Se, the sites from Te3 to Te6 would be occupied successively.

**Table SI. Fractional Atomic Coordinates ( $\times 10^4$ ) and Equivalent Isotropic Displacement Parameters ( $\text{\AA}^2 \times 10^3$ ) for  $\text{Ba}_9\text{Sn}_3\text{Te}_{15}$ .  $U_{\text{eq}}$  is defined as 1/3 of the trace of the orthogonalised  $U_{\text{ij}}$  tensor.**

| Atom | wyck. | x           | y          | z          | Occ.    | U(eq)     |
|------|-------|-------------|------------|------------|---------|-----------|
| Ba1  | 12l   | 0.3774 (0)  | 0.3876 (2) | 0.0833 (2) | 1       | 16.7(2)   |
| Ba2  | 6k    | -0.0222 (9) | 0.3690 (9) | 0.2500     | 1       | 14.9(3)   |
| Sn1  | 2a    | 0           | 0          | 0          | 1       | 19.3(6)   |
| Sn2  | 4g    | 0           | 0          | 0.1661 (6) | 0.96(4) | 14.5(5)   |
| Te1  | 12l   | -0.0027 (4) | 0.2497 (0) | 0.0837 (5) | 1       | 15.03(18) |
| Te2  | 6k    | 0.2447 (0)  | 0.2574 (4) | 0.2500     | 1       | 12.9(2)   |
| Te3  | 2c    | 0.3333      | 0.6667     | 0          | 1       | 15.7(4)   |
| Te4  | 4h    | 0.3333      | 0.6667     | 0.1830 (3) | 1       | 11.1(3)   |
| Te5  | 4i    | -0.3333     | 0.3333     | 0.1559 (9) | 1       | 18.2(4)   |
| Te6  | 4i    | -0.3333     | 0.3333     | 0.0081(6)  | 0.5     | 13(2)     |

**Table SII. Anisotropic Displacement Parameters ( $\text{\AA}^2 \times 10^3$ ) for  $\text{Ba}_9\text{Sn}_3\text{Te}_{15}$ . The Anisotropic displacement factor exponent takes the form:  $-2\pi^2[\text{h}^2\text{a}^{*2}\text{U}_{11} + 2\text{hka}^*\text{b}^*\text{U}_{12} + \dots]$ .**

| Atom | $\text{U}_{11}$ | $\text{U}_{22}$ | $\text{U}_{33}$ | $\text{U}_{23}$ | $\text{U}_{13}$ | $\text{U}_{12}$ |
|------|-----------------|-----------------|-----------------|-----------------|-----------------|-----------------|
| Ba1  | 14.5(5)         | 16.3(4)         | 18.4(3)         | 1.4(3)          | -1.3(3)         | 7.1(3)          |
| Ba2  | 11.9(5)         | 13.5(6)         | 18.6(4)         | 0               | 0               | 5.8(5)          |
| Te1  | 16.0(4)         | 16.3(6)         | 15.5(3)         | 0.2(3)          | -0.2(2)         | 10.2(6)         |
| Te2  | 11.3(7)         | 13.3(6)         | 15.8(5)         | 0               | 0               | 7.4(5)          |
| Te3  | 12.0(6)         | 12.0(6)         | 23(1)           | 0               | 0               | 6.0(3)          |
| Te4  | 11.9(4)         | 11.9(4)         | 9.3(5)          | 0               | 0               | 6.0(2)          |
| Te5  | 12.3(5)         | 12.3(5)         | 30.2(11)        | 0               | 0               | 6.1(3)          |
| Te6  | 12.5(8)         | 12.5(8)         | 15(6)           | 0               | 0               | 6.3(4)          |
| Sn1  | 17.5(8)         | 17.5(8)         | 23.1(16)        | 0               | 0               | 8.7(4)          |
| Sn2  | 16.3(6)         | 16.3(6)         | 10.9(8)         | 0               | 0               | 8.1(3)          |

**Table SIII. Bond Lengths for  $\text{Ba}_9\text{Sn}_3\text{Te}_{15}$ .**

| Atom | Atom              | Length/ $\text{\AA}$ | Atom | Atom              | Length/ $\text{\AA}$ |
|------|-------------------|----------------------|------|-------------------|----------------------|
| Ba1  | Ba1 <sup>1</sup>  | 4.2156(14)           | Te2  | Sn2               | 3.1074(18)           |
| Ba1  | Ba2 <sup>2</sup>  | 4.2395(9)            | Te3  | Ba1 <sup>8</sup>  | 3.5572(12)           |
| Ba1  | Te1 <sup>2</sup>  | 3.7540(11)           | Te3  | Ba1 <sup>3</sup>  | 3.5572(12)           |
| Ba1  | Te1 <sup>3</sup>  | 3.7239(10)           | Te3  | Ba1 <sup>1</sup>  | 3.5572(12)           |
| Ba1  | Te1               | 3.4132(16)           | Te3  | Ba1 <sup>2</sup>  | 3.5572(12)           |
| Ba1  | Te1 <sup>4</sup>  | 3.4826(16)           | Te3  | Ba1 <sup>13</sup> | 3.5572(12)           |
| Ba1  | Te2               | 3.7148(9)            | Te4  | Ba1 <sup>8</sup>  | 3.7347(13)           |
| Ba1  | Te3               | 3.5572(12)           | Te4  | Ba1 <sup>2</sup>  | 3.7348(13)           |
| Ba1  | Te4               | 3.7348(13)           | Te4  | Ba2 <sup>2</sup>  | 3.6587(12)           |
| Ba1  | Te5 <sup>5</sup>  | 3.6068(14)           | Te4  | Ba2 <sup>7</sup>  | 3.6587(12)           |
| Ba1  | Te6 <sup>6</sup>  | 3.787(7)             | Te4  | Te4 <sup>7</sup>  | 2.782(3)             |
| Ba1  | Te6 <sup>5</sup>  | 3.629(6)             | Te5  | Ba1 <sup>14</sup> | 3.6067(14)           |
| Ba2  | Ba1 <sup>7</sup>  | 4.2395(9)            | Te5  | Ba1 <sup>10</sup> | 3.6068(14)           |
| Ba2  | Ba1 <sup>8</sup>  | 4.2395(9)            | Te5  | Ba1 <sup>8</sup>  | 3.6068(14)           |
| Ba2  | Te1               | 3.7021(9)            | Te5  | Ba2 <sup>11</sup> | 3.5953(15)           |
| Ba2  | Te1 <sup>9</sup>  | 3.7021(9)            | Te5  | Ba2 <sup>15</sup> | 3.5953(15)           |
| Ba2  | Te2 <sup>10</sup> | 3.4163(16)           | Te5  | Te6               | 3.071(13)            |
| Ba2  | Te2               | 3.4509(19)           | Te6  | Ba1 <sup>14</sup> | 3.629(6)             |
| Ba2  | Te2 <sup>7</sup>  | 3.7883(18)           | Te6  | Ba1 <sup>16</sup> | 3.787(7)             |
| Ba2  | Te4               | 3.6587(12)           | Te6  | Ba1 <sup>3</sup>  | 3.787(7)             |

|     |                   |            |     |                   |            |
|-----|-------------------|------------|-----|-------------------|------------|
| Ba2 | Te4 <sup>7</sup>  | 3.6587(12) | Te6 | Ba1 <sup>10</sup> | 3.629(6)   |
| Ba2 | Te5               | 3.5953(15) | Te6 | Ba1 <sup>8</sup>  | 3.629(6)   |
| Ba2 | Te5 <sup>11</sup> | 3.5954(15) | Te6 | Ba1 <sup>17</sup> | 3.787(7)   |
| Te1 | Ba1 <sup>8</sup>  | 3.7540(11) | Sn1 | Te1 <sup>18</sup> | 3.1044(8)  |
| Te1 | Ba1 <sup>10</sup> | 3.4825(16) | Sn1 | Te1 <sup>19</sup> | 3.1044(8)  |
| Te1 | Ba1 <sup>3</sup>  | 3.7239(10) | Sn1 | Te1 <sup>10</sup> | 3.1044(8)  |
| Te1 | Sn1               | 3.1044(8)  | Sn1 | Te1 <sup>3</sup>  | 3.1044(8)  |
| Te1 | Sn2               | 3.0889(16) | Sn1 | Te1 <sup>4</sup>  | 3.1044(8)  |
| Te2 | Ba1 <sup>9</sup>  | 3.7148(9)  | Sn2 | Te1 <sup>10</sup> | 3.0890(16) |
| Te2 | Ba2 <sup>2</sup>  | 3.7883(18) | Sn2 | Te1 <sup>4</sup>  | 3.0890(16) |
| Te2 | Ba2 <sup>12</sup> | 3.4163(16) | Sn2 | Te2 <sup>10</sup> | 3.1074(18) |
| Te2 | Sn2 <sup>12</sup> | 3.1074(18) | Sn2 | Te2 <sup>12</sup> | 3.1074(18) |

<sup>1</sup>1-Y,1-X,-Z; <sup>2</sup>1-Y,1+X-Y,+Z; <sup>3</sup>+Y-X,+Y,-Z; <sup>4</sup>+Y-X,-X,+Z; <sup>5</sup>1+X,+Y,+Z; <sup>6</sup>1-Y,-X,-Z; <sup>7</sup>+Y-X,1-X,1/2-Z; <sup>8</sup>+Y-X,1-X,+Z; <sup>9</sup>+X,+Y,1/2-Z; <sup>10</sup>-Y,+X-Y,+Z; <sup>11</sup>-1+Y-X,-X,1/2-Z; <sup>12</sup>+Y-X,-X,1/2-Z; <sup>13</sup>+X,1+X-Y,-Z; <sup>14</sup>-1+X,+Y,+Z; <sup>15</sup>-Y,1+X-Y,+Z; <sup>16</sup>-1+X,+X-Y,-Z; <sup>17</sup>-Y,1-X,-Z; <sup>18</sup>+X,+X-Y,-Z; <sup>19</sup>-Y,-X,-Z

**Table SIV. Bond Angles for Ba<sub>9</sub>Sn<sub>3</sub>Te<sub>15</sub>.**

| Atom Atom Atom Angle/° |     |                  |            | Atom Atom Atom Angle/° |     |                   |           |
|------------------------|-----|------------------|------------|------------------------|-----|-------------------|-----------|
| Ba1 <sup>1</sup>       | Ba1 | Ba2 <sup>2</sup> | 110.09(2)  | Sn2                    | Te1 | Ba1 <sup>10</sup> | 81.02(3)  |
| Te1 <sup>2</sup>       | Ba1 | Ba1 <sup>1</sup> | 55.35(2)   | Sn2                    | Te1 | Ba1               | 82.15(3)  |
| Te1                    | Ba1 | Ba1 <sup>1</sup> | 116.47(3)  | Sn2                    | Te1 | Ba1 <sup>8</sup>  | 146.41(4) |
| Te1 <sup>3</sup>       | Ba1 | Ba1 <sup>1</sup> | 56.02(2)   | Sn2                    | Te1 | Ba1 <sup>3</sup>  | 144.79(4) |
| Te1 <sup>4</sup>       | Ba1 | Ba1 <sup>1</sup> | 115.47(3)  | Sn2                    | Te1 | Ba2               | 77.34(5)  |
| Te1 <sup>4</sup>       | Ba1 | Ba2 <sup>2</sup> | 112.49(3)  | Sn2                    | Te1 | Sn1               | 67.74(4)  |
| Te1                    | Ba1 | Ba2 <sup>2</sup> | 119.08(3)  | Ba1 <sup>9</sup>       | Te2 | Ba1               | 137.51(5) |
| Te1 <sup>3</sup>       | Ba1 | Ba2 <sup>2</sup> | 165.03(2)  | Ba1 <sup>9</sup>       | Te2 | Ba2 <sup>2</sup>  | 68.80(2)  |
| Te1 <sup>2</sup>       | Ba1 | Ba2 <sup>2</sup> | 54.772(18) | Ba1                    | Te2 | Ba2 <sup>2</sup>  | 68.80(2)  |
| Te1                    | Ba1 | Te1 <sup>3</sup> | 74.99(3)   | Ba2                    | Te2 | Ba1               | 95.13(3)  |
| Te1 <sup>4</sup>       | Ba1 | Te1 <sup>3</sup> | 73.20(3)   | Ba2 <sup>12</sup>      | Te2 | Ba1 <sup>9</sup>  | 92.41(4)  |
| Te1 <sup>3</sup>       | Ba1 | Te1 <sup>2</sup> | 111.26(2)  | Ba2                    | Te2 | Ba1 <sup>9</sup>  | 95.13(3)  |
| Te1 <sup>4</sup>       | Ba1 | Te1 <sup>2</sup> | 136.80(5)  | Ba2 <sup>12</sup>      | Te2 | Ba1               | 92.41(4)  |
| Te1                    | Ba1 | Te1 <sup>4</sup> | 80.45(3)   | Ba2                    | Te2 | Ba2 <sup>2</sup>  | 108.03(5) |
| Te1                    | Ba1 | Te1 <sup>2</sup> | 142.75(5)  | Ba2 <sup>12</sup>      | Te2 | Ba2 <sup>2</sup>  | 92.91(5)  |
| Te1 <sup>4</sup>       | Ba1 | Te2              | 74.34(3)   | Ba2 <sup>12</sup>      | Te2 | Ba2               | 159.06(5) |
| Te1                    | Ba1 | Te2              | 73.27(3)   | Sn2                    | Te2 | Ba1               | 77.13(4)  |
| Te1 <sup>4</sup>       | Ba1 | Te3              | 142.00(3)  | Sn2 <sup>12</sup>      | Te2 | Ba1 <sup>9</sup>  | 77.13(4)  |
| Te1                    | Ba1 | Te3              | 75.95(3)   | Sn2                    | Te2 | Ba1 <sup>9</sup>  | 145.28(5) |
| Te1 <sup>3</sup>       | Ba1 | Te4              | 131.06(5)  | Sn2 <sup>12</sup>      | Te2 | Ba1               | 145.28(5) |

|                  |     |                  |             |                   |     |                   |            |
|------------------|-----|------------------|-------------|-------------------|-----|-------------------|------------|
| Te1 <sup>4</sup> | Ba1 | Te4              | 138.41(3)   | Sn2 <sup>12</sup> | Te2 | Ba2               | 81.06(3)   |
| Te1              | Ba1 | Te4              | 76.47(3)    | Sn2               | Te2 | Ba2 <sup>12</sup> | 81.62(3)   |
| Te1              | Ba1 | Te5 <sup>5</sup> | 142.16(3)   | Sn2               | Te2 | Ba2               | 81.06(3)   |
| Te1 <sup>4</sup> | Ba1 | Te5 <sup>5</sup> | 71.93(3)    | Sn2 <sup>12</sup> | Te2 | Ba2 <sup>2</sup>  | 145.25(4)  |
| Te1 <sup>4</sup> | Ba1 | Te6 <sup>5</sup> | 72.18(4)    | Sn2               | Te2 | Ba2 <sup>2</sup>  | 145.25(4)  |
| Te1 <sup>4</sup> | Ba1 | Te6 <sup>6</sup> | 72.96(4)    | Sn2 <sup>12</sup> | Te2 | Ba2 <sup>12</sup> | 81.62(3)   |
| Te1              | Ba1 | Te6 <sup>6</sup> | 138.99(12)  | Sn2 <sup>12</sup> | Te2 | Sn2               | 68.17(7)   |
| Te1 <sup>2</sup> | Ba1 | Te6 <sup>6</sup> | 70.06(4)    | Ba1 <sup>8</sup>  | Te3 | Ba1               | 98.333(19) |
| Te1              | Ba1 | Te6 <sup>5</sup> | 141.92(12)  | Ba1 <sup>3</sup>  | Te3 | Ba1 <sup>2</sup>  | 167.39(3)  |
| Te1 <sup>3</sup> | Ba1 | Te6 <sup>6</sup> | 67.82(16)   | Ba1 <sup>2</sup>  | Te3 | Ba1 <sup>1</sup>  | 91.84(2)   |
| Te2              | Ba1 | Ba1 <sup>1</sup> | 166.43(4)   | Ba1 <sup>2</sup>  | Te3 | Ba1               | 98.333(19) |
| Te2              | Ba1 | Ba2 <sup>2</sup> | 56.42(3)    | Ba1 <sup>13</sup> | Te3 | Ba1 <sup>2</sup>  | 72.68(3)   |
| Te2              | Ba1 | Te1 <sup>3</sup> | 137.54(3)   | Ba1 <sup>3</sup>  | Te3 | Ba1               | 91.84(2)   |
| Te2              | Ba1 | Te1 <sup>2</sup> | 111.11(3)   | Ba1 <sup>8</sup>  | Te3 | Ba1 <sup>1</sup>  | 167.38(3)  |
| Te2              | Ba1 | Te4              | 66.12(3)    | Ba1               | Te3 | Ba1 <sup>1</sup>  | 72.67(3)   |
| Te2              | Ba1 | Te6 <sup>6</sup> | 125.98(16)  | Ba1 <sup>13</sup> | Te3 | Ba1               | 167.39(3)  |
| Te3              | Ba1 | Ba1 <sup>1</sup> | 53.663(15)  | Ba1 <sup>8</sup>  | Te3 | Ba1 <sup>2</sup>  | 98.334(19) |
| Te3              | Ba1 | Ba2 <sup>2</sup> | 104.969(19) | Ba1 <sup>3</sup>  | Te3 | Ba1 <sup>1</sup>  | 98.333(19) |
| Te3              | Ba1 | Te1 <sup>2</sup> | 71.80(3)    | Ba1 <sup>8</sup>  | Te3 | Ba1 <sup>3</sup>  | 72.68(3)   |
| Te3              | Ba1 | Te1 <sup>3</sup> | 72.16(3)    | Ba1 <sup>13</sup> | Te3 | Ba1 <sup>8</sup>  | 91.84(2)   |
| Te3              | Ba1 | Te2              | 124.83(4)   | Ba1 <sup>13</sup> | Te3 | Ba1 <sup>1</sup>  | 98.334(19) |
| Te3              | Ba1 | Te4              | 62.79(3)    | Ba1 <sup>13</sup> | Te3 | Ba1 <sup>3</sup>  | 98.334(19) |
| Te3              | Ba1 | Te5 <sup>5</sup> | 140.47(2)   | Ba1 <sup>2</sup>  | Te4 | Ba1               | 92.22(3)   |
| Te3              | Ba1 | Te6 <sup>6</sup> | 107.25(13)  | Ba1 <sup>8</sup>  | Te4 | Ba1 <sup>2</sup>  | 92.22(3)   |
| Te3              | Ba1 | Te6 <sup>5</sup> | 110.78(14)  | Ba1 <sup>8</sup>  | Te4 | Ba1               | 92.21(3)   |
| Te4              | Ba1 | Ba1 <sup>1</sup> | 105.75(2)   | Ba2 <sup>2</sup>  | Te4 | Ba1 <sup>8</sup>  | 161.95(3)  |
| Te4              | Ba1 | Ba2 <sup>2</sup> | 54.17(2)    | Ba2               | Te4 | Ba1 <sup>2</sup>  | 161.95(3)  |
| Te4              | Ba1 | Te1 <sup>2</sup> | 72.55(3)    | Ba2 <sup>2</sup>  | Te4 | Ba1 <sup>2</sup>  | 91.394(16) |
| Te4              | Ba1 | Te6 <sup>6</sup> | 142.48(6)   | Ba2 <sup>7</sup>  | Te4 | Ba1 <sup>2</sup>  | 69.97(2)   |
| Te5 <sup>5</sup> | Ba1 | Ba1 <sup>1</sup> | 98.81(3)    | Ba2 <sup>2</sup>  | Te4 | Ba1               | 69.97(2)   |
| Te5 <sup>5</sup> | Ba1 | Ba2 <sup>2</sup> | 53.81(3)    | Ba2 <sup>7</sup>  | Te4 | Ba1               | 161.95(3)  |
| Te5 <sup>5</sup> | Ba1 | Te1 <sup>3</sup> | 118.98(5)   | Ba2               | Te4 | Ba1 <sup>8</sup>  | 69.97(2)   |
| Te5 <sup>5</sup> | Ba1 | Te1 <sup>2</sup> | 68.88(2)    | Ba2 <sup>7</sup>  | Te4 | Ba1 <sup>8</sup>  | 91.395(16) |
| Te5 <sup>5</sup> | Ba1 | Te2              | 74.68(4)    | Ba2               | Te4 | Ba1               | 91.395(16) |
| Te5 <sup>5</sup> | Ba1 | Te4              | 107.97(3)   | Ba2               | Te4 | Ba2 <sup>2</sup>  | 106.45(2)  |
| Te5 <sup>5</sup> | Ba1 | Te6 <sup>6</sup> | 54.85(17)   | Ba2 <sup>7</sup>  | Te4 | Ba2 <sup>2</sup>  | 106.45(2)  |
| Te5 <sup>5</sup> | Ba1 | Te6 <sup>5</sup> | 50.23(19)   | Ba2 <sup>7</sup>  | Te4 | Ba2               | 106.45(2)  |
| Te6 <sup>6</sup> | Ba1 | Ba1 <sup>1</sup> | 53.61(13)   | Te4 <sup>7</sup>  | Te4 | Ba1 <sup>2</sup>  | 123.68(2)  |
| Te6 <sup>5</sup> | Ba1 | Ba1 <sup>1</sup> | 57.14(14)   | Te4 <sup>7</sup>  | Te4 | Ba1               | 123.68(2)  |
| Te6 <sup>5</sup> | Ba1 | Ba2 <sup>2</sup> | 95.99(16)   | Te4 <sup>7</sup>  | Te4 | Ba1 <sup>8</sup>  | 123.68(2)  |

|                   |     |                   |             |                   |     |                   |            |
|-------------------|-----|-------------------|-------------|-------------------|-----|-------------------|------------|
| Te6 <sup>6</sup>  | Ba1 | Ba2 <sup>2</sup>  | 99.96(15)   | Te4 <sup>7</sup>  | Te4 | Ba2               | 67.653(19) |
| Te6 <sup>5</sup>  | Ba1 | Te1 <sup>3</sup>  | 72.12(17)   | Te4 <sup>7</sup>  | Te4 | Ba2 <sup>7</sup>  | 67.653(19) |
| Te6 <sup>5</sup>  | Ba1 | Te1 <sup>2</sup>  | 69.14(4)    | Te4 <sup>7</sup>  | Te4 | Ba2 <sup>2</sup>  | 67.652(19) |
| Te6 <sup>5</sup>  | Ba1 | Te2               | 121.75(17)  | Ba1 <sup>10</sup> | Te5 | Ba1 <sup>14</sup> | 103.73(3)  |
| Te6 <sup>5</sup>  | Ba1 | Te4               | 140.90(7)   | Ba1 <sup>10</sup> | Te5 | Ba1 <sup>8</sup>  | 103.72(3)  |
| Te6 <sup>5</sup>  | Ba1 | Te6 <sup>6</sup>  | 4.6(4)      | Ba1 <sup>8</sup>  | Te5 | Ba1 <sup>14</sup> | 103.73(3)  |
| Ba1 <sup>7</sup>  | Ba2 | Ba1 <sup>8</sup>  | 109.51(3)   | Ba2 <sup>15</sup> | Te5 | Ba1 <sup>8</sup>  | 91.335(17) |
| Te1               | Ba2 | Ba1 <sup>7</sup>  | 164.45(3)   | Ba2 <sup>15</sup> | Te5 | Ba1 <sup>14</sup> | 72.12(3)   |
| Te1               | Ba2 | Ba1 <sup>8</sup>  | 55.926(18)  | Ba2 <sup>11</sup> | Te5 | Ba1 <sup>8</sup>  | 164.94(3)  |
| Te1 <sup>9</sup>  | Ba2 | Ba1 <sup>7</sup>  | 55.926(18)  | Ba2               | Te5 | Ba1 <sup>10</sup> | 91.334(17) |
| Te1 <sup>9</sup>  | Ba2 | Ba1 <sup>8</sup>  | 164.45(3)   | Ba2               | Te5 | Ba1 <sup>8</sup>  | 72.12(3)   |
| Te1               | Ba2 | Te1 <sup>9</sup>  | 137.76(4)   | Ba2 <sup>11</sup> | Te5 | Ba1 <sup>10</sup> | 72.12(3)   |
| Te1 <sup>9</sup>  | Ba2 | Te2 <sup>7</sup>  | 110.62(2)   | Ba2 <sup>11</sup> | Te5 | Ba1 <sup>14</sup> | 91.334(17) |
| Te1               | Ba2 | Te2 <sup>7</sup>  | 110.62(2)   | Ba2 <sup>15</sup> | Te5 | Ba1 <sup>10</sup> | 164.94(3)  |
| Te2               | Ba2 | Ba1 <sup>7</sup>  | 111.729(19) | Ba2               | Te5 | Ba1 <sup>14</sup> | 164.94(3)  |
| Te2               | Ba2 | Ba1 <sup>8</sup>  | 111.729(19) | Ba2               | Te5 | Ba2 <sup>11</sup> | 93.29(3)   |
| Te2 <sup>7</sup>  | Ba2 | Ba1 <sup>8</sup>  | 54.780(13)  | Ba2 <sup>11</sup> | Te5 | Ba2 <sup>15</sup> | 93.29(3)   |
| Te2 <sup>7</sup>  | Ba2 | Ba1 <sup>7</sup>  | 54.780(13)  | Ba2               | Te5 | Ba2 <sup>15</sup> | 93.29(3)   |
| Te2 <sup>10</sup> | Ba2 | Ba1 <sup>7</sup>  | 119.699(15) | Te6               | Te5 | Ba1 <sup>8</sup>  | 65.26(3)   |
| Te2 <sup>10</sup> | Ba2 | Ba1 <sup>8</sup>  | 119.699(15) | Te6               | Te5 | Ba1 <sup>10</sup> | 65.26(3)   |
| Te2 <sup>10</sup> | Ba2 | Te1 <sup>9</sup>  | 75.26(2)    | Te6               | Te5 | Ba1 <sup>14</sup> | 65.26(3)   |
| Te2               | Ba2 | Te1 <sup>9</sup>  | 73.02(2)    | Te6               | Te5 | Ba2 <sup>15</sup> | 122.90(2)  |
| Te2               | Ba2 | Te1               | 73.02(2)    | Te6               | Te5 | Ba2               | 122.90(2)  |
| Te2 <sup>10</sup> | Ba2 | Te1               | 75.26(2)    | Te6               | Te5 | Ba2 <sup>11</sup> | 122.90(2)  |
| Te2 <sup>10</sup> | Ba2 | Te2               | 80.94(5)    | Ba1 <sup>14</sup> | Te6 | Ba1 <sup>16</sup> | 69.25(4)   |
| Te2 <sup>10</sup> | Ba2 | Te2 <sup>7</sup>  | 147.08(5)   | Ba1 <sup>10</sup> | Te6 | Ba1 <sup>3</sup>  | 92.23(3)   |
| Te2               | Ba2 | Te2 <sup>7</sup>  | 131.97(5)   | Ba1 <sup>8</sup>  | Te6 | Ba1 <sup>3</sup>  | 69.25(4)   |
| Te2 <sup>10</sup> | Ba2 | Te4               | 142.34(4)   | Ba1 <sup>10</sup> | Te6 | Ba1 <sup>17</sup> | 69.25(4)   |
| Te2               | Ba2 | Te4               | 69.66(3)    | Ba1 <sup>3</sup>  | Te6 | Ba1 <sup>17</sup> | 97.0(2)    |
| Te2 <sup>10</sup> | Ba2 | Te4 <sup>7</sup>  | 142.34(4)   | Ba1 <sup>8</sup>  | Te6 | Ba1 <sup>16</sup> | 92.23(3)   |
| Te2               | Ba2 | Te4 <sup>7</sup>  | 69.66(3)    | Ba1 <sup>10</sup> | Te6 | Ba1 <sup>16</sup> | 164.37(11) |
| Te2               | Ba2 | Te5 <sup>11</sup> | 140.77(3)   | Ba1 <sup>14</sup> | Te6 | Ba1 <sup>3</sup>  | 164.37(11) |
| Te2               | Ba2 | Te5               | 140.77(3)   | Ba1 <sup>8</sup>  | Te6 | Ba1 <sup>17</sup> | 164.37(11) |
| Te2 <sup>10</sup> | Ba2 | Te5 <sup>11</sup> | 78.57(3)    | Ba1 <sup>10</sup> | Te6 | Ba1 <sup>14</sup> | 102.8(2)   |
| Te2 <sup>10</sup> | Ba2 | Te5               | 78.57(3)    | Ba1 <sup>10</sup> | Te6 | Ba1 <sup>8</sup>  | 102.8(2)   |
| Te4 <sup>7</sup>  | Ba2 | Ba1 <sup>8</sup>  | 93.43(2)    | Ba1 <sup>17</sup> | Te6 | Ba1 <sup>16</sup> | 97.0(2)    |
| Te4               | Ba2 | Ba1 <sup>7</sup>  | 93.43(2)    | Ba1 <sup>3</sup>  | Te6 | Ba1 <sup>16</sup> | 97.0(2)    |
| Te4               | Ba2 | Ba1 <sup>8</sup>  | 55.86(2)    | Ba1 <sup>14</sup> | Te6 | Ba1 <sup>17</sup> | 92.23(3)   |
| Te4 <sup>7</sup>  | Ba2 | Ba1 <sup>7</sup>  | 55.86(2)    | Ba1 <sup>8</sup>  | Te6 | Ba1 <sup>14</sup> | 102.8(2)   |
| Te4 <sup>7</sup>  | Ba2 | Te1               | 115.73(4)   | Te5               | Te6 | Ba1 <sup>16</sup> | 120.11(17) |

|                   |     |                   |           |                   |     |                   |            |
|-------------------|-----|-------------------|-----------|-------------------|-----|-------------------|------------|
| Te4               | Ba2 | Te1 <sup>9</sup>  | 115.73(4) | Te5               | Te6 | Ba1 <sup>3</sup>  | 120.11(17) |
| Te4 <sup>7</sup>  | Ba2 | Te1 <sup>9</sup>  | 74.02(3)  | Te5               | Te6 | Ba1 <sup>17</sup> | 120.11(17) |
| Te4               | Ba2 | Te1               | 74.02(3)  | Te5               | Te6 | Ba1 <sup>8</sup>  | 64.51(19)  |
| Te4               | Ba2 | Te2 <sup>7</sup>  | 66.12(3)  | Te5               | Te6 | Ba1 <sup>14</sup> | 64.51(19)  |
| Te4 <sup>7</sup>  | Ba2 | Te2 <sup>7</sup>  | 66.12(3)  | Te5               | Te6 | Ba1 <sup>10</sup> | 64.51(19)  |
| Te4               | Ba2 | Te4 <sup>7</sup>  | 44.69(4)  | Te1 <sup>18</sup> | Sn1 | Te1 <sup>19</sup> | 91.66(2)   |
| Te5               | Ba2 | Ba1 <sup>8</sup>  | 54.06(2)  | Te1 <sup>18</sup> | Sn1 | Te1 <sup>10</sup> | 87.70(4)   |
| Te5 <sup>11</sup> | Ba2 | Ba1 <sup>7</sup>  | 54.06(2)  | Te1 <sup>18</sup> | Sn1 | Te1 <sup>4</sup>  | 88.99(4)   |
| Te5 <sup>11</sup> | Ba2 | Ba1 <sup>8</sup>  | 107.47(3) | Te1 <sup>4</sup>  | Sn1 | Te1               | 91.66(2)   |
| Te5               | Ba2 | Ba1 <sup>7</sup>  | 107.48(3) | Te1 <sup>19</sup> | Sn1 | Te1 <sup>10</sup> | 88.99(4)   |
| Te5               | Ba2 | Te1 <sup>9</sup>  | 131.64(4) | Te1 <sup>3</sup>  | Sn1 | Te1               | 88.99(4)   |
| Te5 <sup>11</sup> | Ba2 | Te1 <sup>9</sup>  | 69.58(3)  | Te1 <sup>4</sup>  | Sn1 | Te1 <sup>3</sup>  | 87.70(4)   |
| Te5               | Ba2 | Te1               | 69.58(3)  | Te1 <sup>19</sup> | Sn1 | Te1               | 87.70(4)   |
| Te5 <sup>11</sup> | Ba2 | Te1               | 131.64(4) | Te1 <sup>19</sup> | Sn1 | Te1 <sup>4</sup>  | 179.10(5)  |
| Te5 <sup>11</sup> | Ba2 | Te2 <sup>7</sup>  | 73.92(3)  | Te1 <sup>10</sup> | Sn1 | Te1               | 91.66(2)   |
| Te5               | Ba2 | Te2 <sup>7</sup>  | 73.92(3)  | Te1 <sup>18</sup> | Sn1 | Te1 <sup>3</sup>  | 91.66(2)   |
| Te5               | Ba2 | Te4               | 109.91(3) | Te1 <sup>4</sup>  | Sn1 | Te1 <sup>10</sup> | 91.66(2)   |
| Te5               | Ba2 | Te4 <sup>7</sup>  | 138.90(3) | Te1 <sup>3</sup>  | Sn1 | Te1 <sup>10</sup> | 179.10(5)  |
| Te5 <sup>11</sup> | Ba2 | Te4 <sup>7</sup>  | 109.91(3) | Te1 <sup>18</sup> | Sn1 | Te1               | 179.10(5)  |
| Te5 <sup>11</sup> | Ba2 | Te4               | 138.90(3) | Te1 <sup>19</sup> | Sn1 | Te1 <sup>3</sup>  | 91.66(2)   |
| Te5               | Ba2 | Te5 <sup>11</sup> | 65.80(5)  | Te1               | Sn2 | Te1 <sup>10</sup> | 92.25(5)   |
| Ba1               | Te1 | Ba1 <sup>8</sup>  | 97.25(5)  | Te1               | Sn2 | Te1 <sup>4</sup>  | 92.25(5)   |
| Ba1 <sup>10</sup> | Te1 | Ba1 <sup>3</sup>  | 95.71(4)  | Te1 <sup>10</sup> | Sn2 | Te1 <sup>4</sup>  | 92.25(5)   |
| Ba1               | Te1 | Ba1 <sup>3</sup>  | 91.35(4)  | Te1 <sup>10</sup> | Sn2 | Te2 <sup>10</sup> | 86.88(4)   |
| Ba1 <sup>3</sup>  | Te1 | Ba1 <sup>8</sup>  | 68.63(2)  | Te1 <sup>10</sup> | Sn2 | Te2               | 178.30(5)  |
| Ba1               | Te1 | Ba1 <sup>10</sup> | 159.55(3) | Te1               | Sn2 | Te2 <sup>12</sup> | 178.30(5)  |
| Ba1 <sup>10</sup> | Te1 | Ba1 <sup>8</sup>  | 103.20(5) | Te1 <sup>4</sup>  | Sn2 | Te2               | 89.24(3)   |
| Ba1               | Te1 | Ba2               | 96.01(4)  | Te1               | Sn2 | Te2               | 86.88(4)   |
| Ba1 <sup>10</sup> | Te1 | Ba2               | 91.57(4)  | Te1 <sup>10</sup> | Sn2 | Te2 <sup>12</sup> | 89.24(3)   |
| Ba2               | Te1 | Ba1 <sup>8</sup>  | 69.30(3)  | Te1 <sup>4</sup>  | Sn2 | Te2 <sup>12</sup> | 86.88(4)   |
| Ba2               | Te1 | Ba1 <sup>3</sup>  | 137.87(3) | Te1               | Sn2 | Te2 <sup>10</sup> | 89.24(3)   |
| Sn1               | Te1 | Ba1 <sup>10</sup> | 80.90(3)  | Te1 <sup>4</sup>  | Sn2 | Te2 <sup>10</sup> | 178.30(5)  |
| Sn1               | Te1 | Ba1 <sup>8</sup>  | 145.71(3) | Te2 <sup>12</sup> | Sn2 | Te2               | 91.65(5)   |
| Sn1               | Te1 | Ba1 <sup>3</sup>  | 77.11(2)  | Te2 <sup>10</sup> | Sn2 | Te2               | 91.65(5)   |
| Sn1               | Te1 | Ba1               | 82.02(3)  | Te2 <sup>10</sup> | Sn2 | Te2 <sup>12</sup> | 91.65(5)   |
| Sn1               | Te1 | Ba2               | 144.98(3) |                   |     |                   |            |

<sup>1</sup>1-Y,1-X,-Z; <sup>2</sup>1-Y,1+X-Y,+Z; <sup>3</sup>+Y-X,+Y,-Z; <sup>4</sup>+Y-X,-X,+Z; <sup>5</sup>1+X,+Y,+Z; <sup>6</sup>1-Y,-X,-Z; <sup>7</sup>+Y-X,1-X,1/2-Z; <sup>8</sup>+Y-X,1-X,+Z; <sup>9</sup>+X,+Y,1/2-Z; <sup>10</sup>-Y,+X-Y,+Z; <sup>11</sup>-1+Y-X,-X,1/2-Z; <sup>12</sup>+Y-X,-X,1/2-Z; <sup>13</sup>+X,1+X-Y,-Z; <sup>14</sup>-1+X,+Y,+Z; <sup>15</sup>-Y,1+X-Y,+Z; <sup>16</sup>-Y,1-X,-Z; <sup>17</sup>-1+X,+X-Y,-Z; <sup>18</sup>+X,+X-Y,-Z; <sup>19</sup>-Y,-X,-Z

**Table SV. Crystallographic parameters of Ba<sub>9</sub>Sn<sub>3</sub>(Te<sub>0.8</sub>Se<sub>0.2</sub>)<sub>15</sub>.**

| Crystallographic data of Ba <sub>9</sub> Sn <sub>3</sub> (Te <sub>0.8</sub> Se <sub>0.2</sub> ) <sub>15</sub> |       |                                                       |            |            |          |
|---------------------------------------------------------------------------------------------------------------|-------|-------------------------------------------------------|------------|------------|----------|
| Formula : Ba <sub>9</sub> Sn <sub>3</sub> (Te <sub>0.8</sub> Se <sub>0.2</sub> ) <sub>15</sub>                |       | Z = 2                                                 |            |            |          |
| Crystal system : hexagonal                                                                                    |       | Calculated unit cell formula weight: 6712.25(0) g/mol |            |            |          |
| Space group : P -6c2 (188)                                                                                    |       |                                                       |            |            |          |
| Crystal parameters: $a = b = 10.1850(2)$ (Å); $c = 20.4055(7)$ (Å); $V = 1833.17(0)$ (Å <sup>3</sup> )        |       |                                                       |            |            |          |
| $\chi^2 = 6.0(1)$ ; $R_p = 3.2(5)\%$ $R_{wp} = 5.0(3)\%$                                                      |       |                                                       |            |            |          |
| Atomic parameters                                                                                             |       |                                                       |            |            |          |
| Atom                                                                                                          | wyck. | x                                                     | y          | z          | Occ.     |
| Ba1                                                                                                           | 12l   | -0.0041(8)                                            | 0.3712 (9) | 0.0856(0)  | 1        |
| Ba2                                                                                                           | 6k    | 0.3763(5)                                             | 0.3804 (1) | 0.2500(0)  | 1        |
| Sn1                                                                                                           | 2a    | 0.0000(0)                                             | 0.0000(0)  | 0.0000(0)  | 0.973(2) |
| Sn2                                                                                                           | 4g    | 0.0000(0)                                             | 0.0000(0)  | 0.1654(8)  | 0.976(7) |
| Te1                                                                                                           | 12l   | 0.2578(7)                                             | 0.2483 (9) | 0.0836 (6) | 0.567(3) |
| Se1                                                                                                           | 12l   | 0.2419(0)                                             | 0.2492(7)  | 0.0872(2)  | 0.432(7) |
| Te2                                                                                                           | 6k    | -0.0042(4)                                            | 0.2505(3)  | 0.2500(0)  | 0.932(7) |
| Se2                                                                                                           | 6k    | -0.0035(9)                                            | 0.2702(7)  | 0.2500(0)  | 0.035(9) |
| Te3                                                                                                           | 2c    | 0.3333(3)                                             | 0.6666(7)  | 0.0000(0)  | 1        |
| Se3                                                                                                           | 2c    | 0.3333(3)                                             | 0.6666(7)  | 0.0000(0)  | 0        |
| Te4                                                                                                           | 4h    | 0.3333(3)                                             | 0.6666(7)  | 0.1704(5)  | 1        |
| Se4                                                                                                           | 4h    | 0.3333(3)                                             | 0.6666(7)  | 0.1622(2)  | 0        |
| Te5                                                                                                           | 4i    | 0.6666(7)                                             | 0.3333(3)  | 0.1704(2)  | 1        |
| Se5                                                                                                           | 4i    | 0.6666(7)                                             | 0.3333(3)  | 0.1742(0)  | 0        |
| Te6                                                                                                           | 4i    | 0.6666(7)                                             | 0.3333(3)  | 0.1251(7)  | 0.5      |
| Se6                                                                                                           | 4i    | 0.6666(7)                                             | 0.3333(3)  | 0.2604(9)  | 0        |

**Table SVI. Crystallographic parameters of Ba<sub>9</sub>Sn<sub>3</sub>(Te<sub>0.6</sub>Se<sub>0.4</sub>)<sub>15</sub>.****Crystallographic data of Ba<sub>9</sub>Sn<sub>3</sub>(Te<sub>0.6</sub>Se<sub>0.4</sub>)<sub>15</sub>**Formula : Ba<sub>9</sub>Sn<sub>3</sub>(Te<sub>0.6</sub>Se<sub>0.4</sub>)<sub>15</sub>

Z = 2

Crystal system : hexagonal

Calculated unit cell formula weight: 6122.32(0) g/mol

Space group : P -6c2 (188)

Crystal parameters:  $a = b = 10.1209(0)$  (Å);  $c = 20.0549(3)$  (Å);  $V = 1779.05(7)$  (Å<sup>3</sup>) $\chi^2 = 2.8(4)$ ;  $R_p = 3.2(0)\%$   $R_{wp} = 4.4(6)\%$ **Atomic parameters**

| Atom | wyck. | x          | y          | z          | Occ.     |
|------|-------|------------|------------|------------|----------|
| Ba1  | 12l   | -0.0014(2) | 0.3714 (3) | 0.0850(8)  | 1        |
| Ba2  | 6k    | 0.3679(6)  | 0.3677 (6) | 0.2500(0)  | 1        |
| Sn1  | 2a    | 0.0000(0)  | 0.0000(0)  | 0.0000(0)  | 0.815(9) |
| Sn2  | 4g    | 0.0000(0)  | 0.0000(0)  | 0.1758(4)  | 0.853(8) |
| Te1  | 12l   | 0.2431(5)  | 0.2229(0)  | 0.0866(7)  | 0.335(2) |
| Se1  | 12l   | 0.2478(0)  | 0.2469(4)  | 0.0860(9)  | 0.664(8) |
| Te2  | 6k    | -0.0258(0) | 0.2501(3)  | 0.2500(0)  | 0.348(1) |
| Se2  | 6k    | -0.0025(5) | 0.2646(5)  | 0.2500(0)  | 0.651(9) |
| Te3  | 2c    | 0.3333(3)  | 0.6666(7)  | 0.0000(0)  | 1        |
| Se3  | 2c    | 0.3333(3)  | 0.6666(7)  | 0.0000(0)  | 0        |
| Te4  | 4h    | 0.3333(3)  | 0.6666(7)  | 0.1609(2)  | 0.774(9) |
| Se4  | 4h    | 0.3333(3)  | 0.6666(7)  | 0.1673(4)  | 0.225(1) |
| Te5  | 4i    | 0.6666(7)  | 0.3333(3)  | 0.1557(8)  | 0.861(3) |
| Se5  | 4i    | 0.6666(7)  | 0.3333(3)  | 0.1617(2)  | 0.138(7) |
| Te6  | 4i    | 0.6666(7)  | 0.3333(3)  | 0.0006 (6) | 0.5      |
| Se6  | 4i    | 0.6666(7)  | 0.3333(3)  | 0.0006(6)  | 0        |



**Table SVII. Crystallographic parameters of Ba<sub>9</sub>Sn<sub>3</sub>(Te<sub>0.4</sub>Se<sub>0.6</sub>)<sub>15</sub>.****Crystallographic data of Ba<sub>9</sub>Sn<sub>3</sub>(Te<sub>0.4</sub>Se<sub>0.6</sub>)<sub>15</sub>**Formula : Ba<sub>9</sub>Sn<sub>3</sub>(Te<sub>0.4</sub>Se<sub>0.6</sub>)<sub>15</sub>

Z = 2

Crystal system : hexagonal

Calculated unit cell formula weight: 5908.11(6)g/mol

Space group : P -6c2 (188)

Crystal parameters:  $a = b = 9.9850(3)$  (Å);  $c = 19.8115(4)$  (Å);  $V = 1710.52(1)$  (Å<sup>3</sup>) $\chi^2 = 5.1(2)$ ;  $R_p = 2.8(6)\%$   $R_{wp} = 4.3(5)\%$ **Atomic parameters**

| Atom | wyck. | x         | y          | z          | Occ.     |
|------|-------|-----------|------------|------------|----------|
| Ba1  | 12l   | 0.0011(3) | 0.3743 (1) | 0.0845(1)  | 1        |
| Ba2  | 6k    | 0.3721(7) | 0.3631(4)  | 0.2500(0)  | 1        |
| Sn1  | 2a    | 0.0000(0) | 0.0000(0)  | 0.0000(0)  | 0.875(1) |
| Sn2  | 4g    | 0.0000(0) | 0.0000(0)  | 0.1741(0)  | 0.792(4) |
| Te1  | 12l   | 0.2389(7) | 0.2568(5)  | 0.0843(4)  | 0.222(5) |
| Se1  | 12l   | 0.2300(2) | 0.2396(3)  | 0.0852(3)  | 0.777(5) |
| Te2  | 6k    | 0.0222(2) | 0.2817(2)  | 0.2500(0)  | 0        |
| Se2  | 6k    | 0.0232(0) | 0.2935(3)  | 0.2500(0)  | 1        |
| Te3  | 2c    | 0.3333(3) | 0.6666(7)  | 0.0000(0)  | 1        |
| Se3  | 2c    | 0.3333(3) | 0.6666(7)  | 0.0000(0)  | 0        |
| Te4  | 4h    | 0.3333(3) | 0.6666(7)  | 0.1738(5)  | 0.395(9) |
| Se4  | 4h    | 0.3333(3) | 0.6666(7)  | 0.1667(7)  | 0.604(1) |
| Te5  | 4i    | 0.6666(7) | 0.3333(3)  | 0.1538(4)  | 0.941(1) |
| Se5  | 4i    | 0.6666(7) | 0.3333(3)  | 0.1538(4)  | 0.142(8) |
| Te6  | 4i    | 0.6666(7) | 0.3333(3)  | 0.0006 (6) | 0.5      |
| Se6  | 4i    | 0.6666(7) | 0.3333(3)  | 0.0006(6)  | 0        |

**Table SVIII. Crystallographic parameters of Ba<sub>9</sub>Sn<sub>3</sub>(Te<sub>0.2</sub>Se<sub>0.8</sub>)<sub>15</sub>.****Crystallographic data of Ba<sub>9</sub>Sn<sub>3</sub>(Te<sub>0.2</sub>Se<sub>0.8</sub>)<sub>15</sub>**Formula : Ba<sub>9</sub>Sn<sub>3</sub>(Te<sub>0.2</sub>Se<sub>0.8</sub>)<sub>15</sub>

Z = 2

Crystal system : hexagonal

Calculated unit cell formula weight: 5656.63(3)g/mol

Space group : P -6c2 (188)

Crystal parameters:  $a = b = 9.7846(3)$  (Å);  $c = 19.7379(0)$  (Å);  $V = 1636.51(7)$  (Å<sup>3</sup>) $\chi^2 = 5.7(1)$ ;  $R_p = 3.0(8)\%$   $R_{wp} = 4.7(3)\%$ **Atomic parameters**

| Atom | wyck. | x          | y          | z          | Occ.     |
|------|-------|------------|------------|------------|----------|
| Ba1  | 12l   | -0.0159(1) | 0.3757 (4) | 0.0863(7)  | 1        |
| Ba2  | 6k    | 0.3611(9)  | 0.3796(1)  | 0.2500(0)  | 1        |
| Sn1  | 2a    | 0.0000(0)  | 0.0000(0)  | 0.0000(0)  | 0.638(6) |
| Sn2  | 4g    | 0.0000(0)  | 0.0000(0)  | 0.1781(6)  | 0.761(0) |
| Te1  | 12l   | 0.2406(1)  | 0.2040(5)  | 0.0773(7)  | 0.048(8) |
| Se1  | 12l   | 0.2351(1)  | 0.2317 (7) | 0.0789 (4) | 0.955(7) |
| Te2  | 6k    | -0.0248(6) | 0.2651(5)  | 0.2500(0)  | 0        |
| Se2  | 6k    | -0.0170(1) | 0.2596(0)  | 0.2500(0)  | 1        |
| Te3  | 2c    | 0.3333(3)  | 0.6666(7)  | 0.0000(0)  | 0        |
| Se3  | 2c    | 0.3333(3)  | 0.6666(7)  | 0.0000(0)  | 1        |
| Te4  | 4h    | 0.3333(3)  | 0.6666(7)  | 0.1537(7)  | 0.390(2) |
| Se4  | 4h    | 0.3333(3)  | 0.6666(7)  | 0.1562(4)  | 0.612(0) |
| Te5  | 4i    | 0.6666(7)  | 0.3333(3)  | 0.1816(3)  | 0.965(7) |
| Se5  | 4i    | 0.6666(7)  | 0.3333(3)  | 0.1869(5)  | 0.037(3) |
| Te6  | 4i    | 0.6666(7)  | 0.3333(3)  | 0.0062 (9) | 0        |
| Se6  | 4i    | 0.6666(7)  | 0.3333(3)  | 0.0170(6)  | 0.5      |

**Table SIX. Crystallographic parameters of Ba<sub>9</sub>Sn<sub>3</sub>Se<sub>15</sub>.****Crystallographic data of Ba<sub>9</sub>Sn<sub>3</sub>Se<sub>15</sub>**Formula : Ba<sub>9</sub>Sn<sub>3</sub>Se<sub>15</sub>

Z = 2

Crystal system : hexagonal

Calculated unit cell formula weight: 5334.07(9) g/mol

Space group : P -6c2 (188)

Crystal parameters:  $a = b = 9.7209(3)$  (Å);  $c = 19.5817(1)$  (Å);  $V = 1602.489(1)$  (Å<sup>3</sup>) $\chi^2 = 2.9(1)$ ;  $R_p = 3.4(0)\%$   $R_{wp} = 4.6(2)\%$ **Atomic parameters**

| Atom | wyck. | x         | y         | z         | Occ.     |
|------|-------|-----------|-----------|-----------|----------|
| Ba1  | 12l   | 0.0040(8) | 0.3746(9) | 0.0833(3) | 1        |
| Ba2  | 6k    | 0.3765(3) | 0.3772(0) | 0.2500(0) | 1        |
| Sn1  | 2a    | 0.0000(0) | 0.0000(0) | 0.0000(0) | 0.713(1) |
| Sn2  | 4g    | 0.0000(0) | 0.0000(0) | 0.1478(9) | 0.662(2) |
| Se1  | 12l   | 0.2638(9) | 0.2656(6) | 0.0828(4) | 1        |
| Se2  | 6k    | 0.0041(3) | 0.2309(1) | 0.2500(0) | 1        |
| Se3  | 2c    | 0.3333(3) | 0.6666(7) | 0.0000(0) | 1        |
| Se4  | 4h    | 0.3333(3) | 0.6666(7) | 0.1710(2) | 1        |
| Se5  | 4i    | 0.6666(7) | 0.3333(3) | 0.1553(6) | 1        |
| Se6  | 4i    | 0.6666(7) | 0.3333(3) | 0.0270(2) | 0.5      |

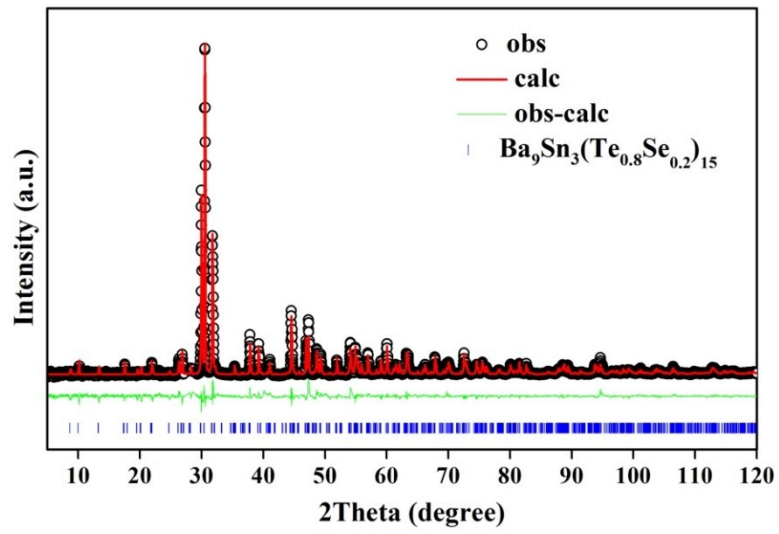

Fig.S1 The power X-ray diffraction and its refinement for  $\text{Ba}_9\text{Sn}_3(\text{Te}_{0.8}\text{Se}_{0.2})_{15}$ .

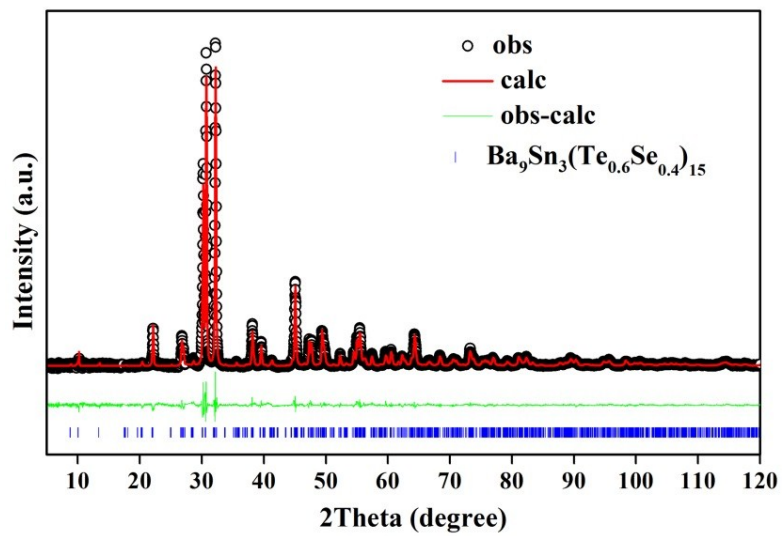

Fig.S2 The power X-ray diffraction and its refinement for  $\text{Ba}_9\text{Sn}_3(\text{Te}_{0.6}\text{Se}_{0.4})_{15}$ .

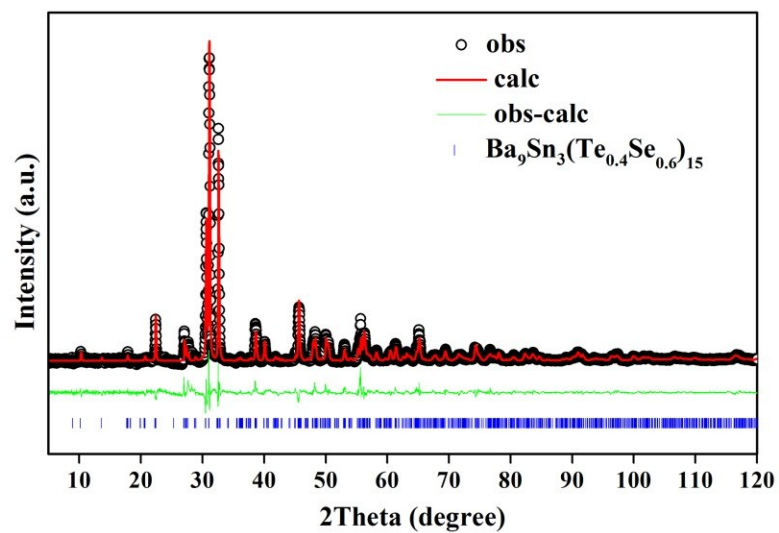

Fig.S3 The power X-ray diffraction and its refinement for  $\text{Ba}_9\text{Sn}_3(\text{Te}_{0.4}\text{Se}_{0.6})_{15}$ .

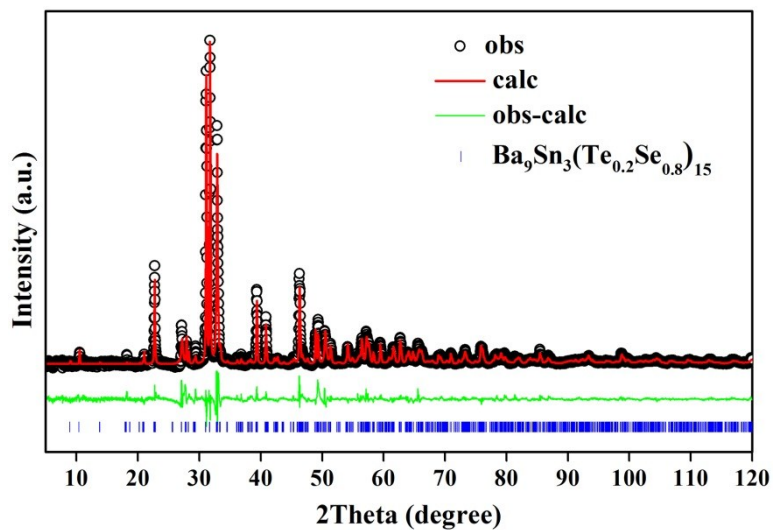

Fig.S4 The power X-ray diffraction and its refinement for  $\text{Ba}_9\text{Sn}_3(\text{Te}_{0.2}\text{Se}_{0.8})_{15}$ .

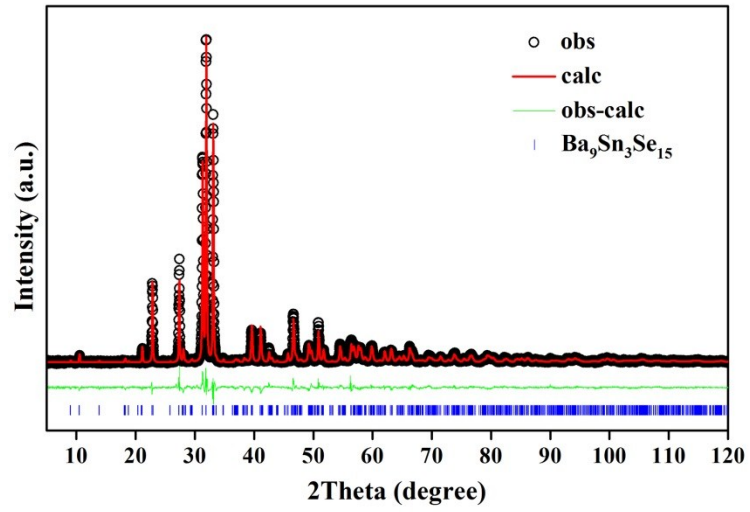

Fig.S5 The power X-ray diffraction and its refinement for  $\text{Ba}_9\text{Sn}_3\text{Se}_{15}$ .
